# Supplementary material for: Treatment-free remission following frontline nilotinib in patients with chronic phase chronic myeloid leukemia: 5-year update of the ENESTfreedom trial
Source: PubMed Central journal article supplement (PMC8102196; doi:10.1038/s41375-021-01205-5), 2021-03-11

Supplementary Figure 1. A.  
 Cumulative incidence of first musculoskeletal pain event in the TFR phase.

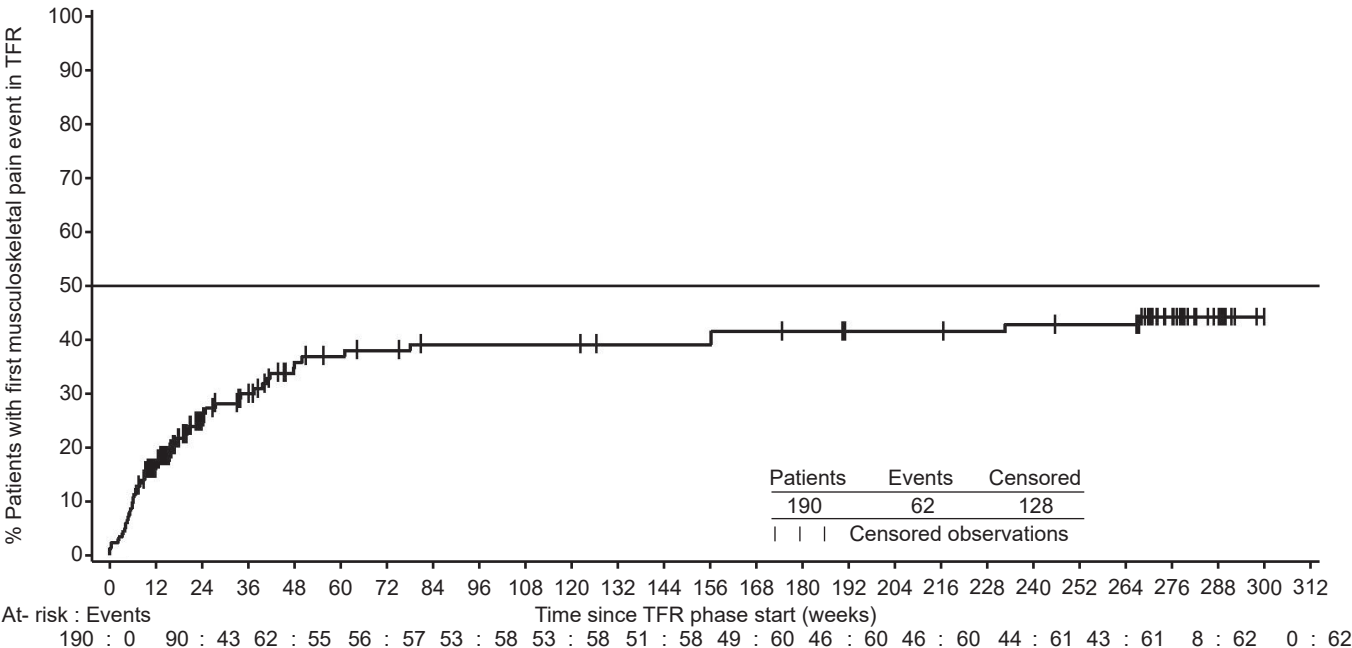

Supplement: 41375_2021_1205_MOESM2_ESM.pdf [file 41375_2021_1205_MOESM2_ESM.pdf]
