# Supplementary material for: Treatment-free remission following frontline nilotinib in patients with chronic phase chronic myeloid leukemia: 5-year update of the ENESTfreedom trial
Source: PubMed Central journal article supplement (PMC8102196; doi:10.1038/s41375-021-01205-5), 2021-03-11
Supplement: 41375_2021_1205_MOESM3_ESM.pdf [file 41375_2021_1205_MOESM3_ESM.pdf]

Supplementary Figure 1B.  
 Duration of first musculoskeletal pain event in the TFR phase.

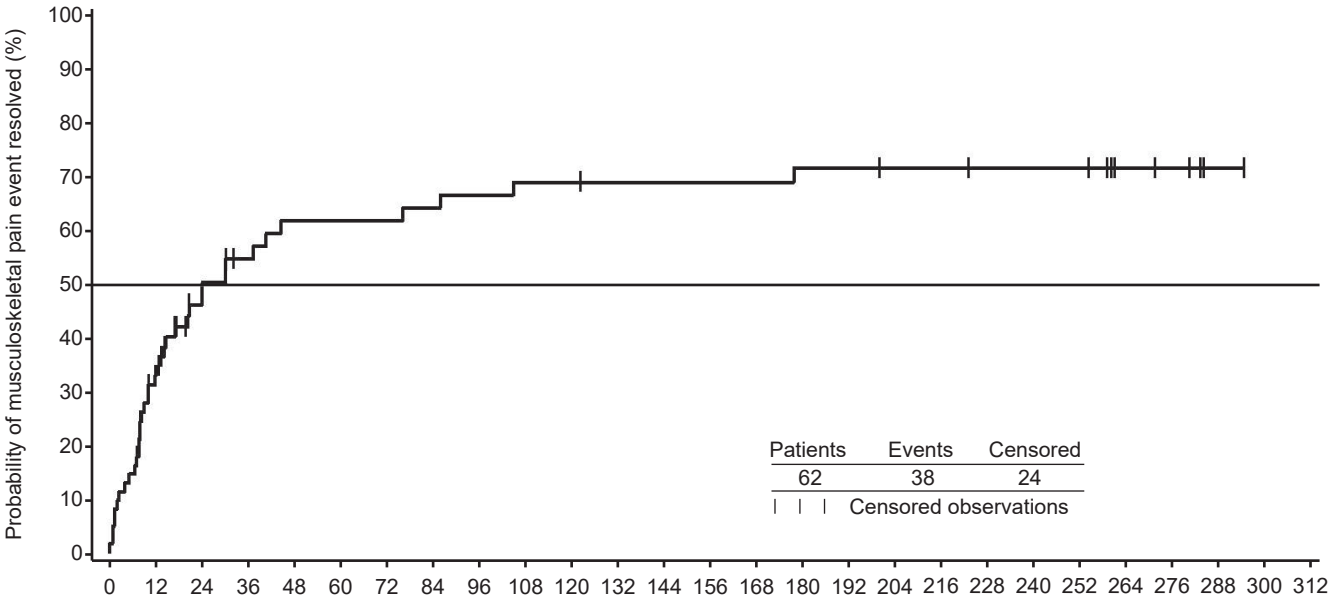

| Patients | Events | Censored |
|----------|--------|----------|
| 62       | 38     | 24       |

| | | Censored observations

At-risk : Events  
 62 : 0    24 : 28    16 : 34    16 : 34    14 : 36    13 : 37    12 : 37    12 : 37    11 : 38    10 : 38    9 : 38    5 : 38    1 : 38    0 : 38
